# Supplementary material for: Molecular and Electronic Structures of Macrocyclic Compounds Formed at Template Synthesis in the M(II)—Thiocarbohydrazide—Diacetyl Triple Systems: A Quantum-Chemical Analysis by DFT Methods
Source: MDPI journal article supplement (doi:10.3390/molecules28114383), 2023-05-27
Supplement: s1 [file s1]

## NBO Analysis Data of NiL complex (L<sup>2-</sup> is double deprotonated form of 3,10-dithio-6,7,13,14-tetramethyl-1,2,4,5,8,9,11,12-octaazacyclotetradecatetraene-1,5,7,12)

### DFT B3PW91/TZVP level

$\Delta E(\text{multipl.}=1) = 0.0$  кДж/моль

$\Delta E(\text{multipl.}=3) = 132.3$  кДж/моль

Alpha occupied eigenvalues (highest) = -5.6697477 eV

Alpha virtual eigenvalues (lowest) = -3.091056 eV

$\langle S^2 \rangle = 0.0000$

#### Summary of Natural Population Analysis:

|           |    |                | Natural Population |           |         |           |
|-----------|----|----------------|--------------------|-----------|---------|-----------|
| Atom      | No | Natural Charge | Core               | Valence   | Rydberg | Total     |
| Ni        | 1  | 0.37942        | 17.99148           | 9.61737   | 0.01174 | 27.62058  |
| N         | 2  | -0.31645       | 1.99918            | 5.28260   | 0.03466 | 7.31645   |
| N         | 3  | -0.18726       | 1.99907            | 5.15745   | 0.03074 | 7.18726   |
| N         | 4  | -0.31649       | 1.99918            | 5.28264   | 0.03466 | 7.31649   |
| N         | 5  | -0.18726       | 1.99907            | 5.15745   | 0.03075 | 7.18726   |
| N         | 6  | -0.39196       | 1.99939            | 5.37012   | 0.02245 | 7.39196   |
| N         | 7  | -0.39199       | 1.99939            | 5.37015   | 0.02245 | 7.39199   |
| H         | 8  | 0.41893        | 0.00000            | 0.57800   | 0.00307 | 0.58107   |
| H         | 9  | 0.41895        | 0.00000            | 0.57798   | 0.00307 | 0.58105   |
| C         | 10 | 0.18589        | 1.99941            | 3.78055   | 0.03414 | 5.81411   |
| C         | 11 | 0.18591        | 1.99941            | 3.78054   | 0.03414 | 5.81409   |
| S         | 12 | -0.14926       | 9.99902            | 6.12918   | 0.02106 | 16.14926  |
| S         | 13 | -0.14929       | 9.99902            | 6.12921   | 0.02106 | 16.14929  |
| N         | 14 | -0.14289       | 1.99930            | 5.12059   | 0.02300 | 7.14289   |
| N         | 15 | -0.14286       | 1.99930            | 5.12056   | 0.02300 | 7.14286   |
| C         | 16 | 0.20388        | 1.99918            | 3.77647   | 0.02047 | 5.79612   |
| C         | 17 | 0.20390        | 1.99918            | 3.77645   | 0.02047 | 5.79610   |
| C         | 18 | 0.11132        | 1.99921            | 3.86598   | 0.02350 | 5.88868   |
| C         | 19 | 0.11131        | 1.99921            | 3.86598   | 0.02350 | 5.88869   |
| C         | 20 | -0.68313       | 1.99941            | 4.67541   | 0.00831 | 6.68313   |
| H         | 21 | 0.23468        | 0.00000            | 0.76354   | 0.00178 | 0.76532   |
| H         | 22 | 0.23466        | 0.00000            | 0.76356   | 0.00178 | 0.76534   |
| H         | 23 | 0.25018        | 0.00000            | 0.74868   | 0.00114 | 0.74982   |
| C         | 24 | -0.63903       | 1.99942            | 4.63163   | 0.00799 | 6.63903   |
| H         | 25 | 0.21362        | 0.00000            | 0.78501   | 0.00137 | 0.78638   |
| H         | 26 | 0.21362        | 0.00000            | 0.78501   | 0.00137 | 0.78638   |
| H         | 27 | 0.25351        | 0.00000            | 0.74518   | 0.00131 | 0.74649   |
| C         | 28 | -0.63904       | 1.99942            | 4.63163   | 0.00799 | 6.63904   |
| H         | 29 | 0.21362        | 0.00000            | 0.78501   | 0.00137 | 0.78638   |
| H         | 30 | 0.25351        | 0.00000            | 0.74517   | 0.00131 | 0.74649   |
| H         | 31 | 0.21362        | 0.00000            | 0.78501   | 0.00137 | 0.78638   |
| C         | 32 | -0.68312       | 1.99941            | 4.67540   | 0.00831 | 6.68312   |
| H         | 33 | 0.23468        | 0.00000            | 0.76354   | 0.00178 | 0.76532   |
| H         | 34 | 0.23466        | 0.00000            | 0.76356   | 0.00178 | 0.76534   |
| H         | 35 | 0.25018        | 0.00000            | 0.74868   | 0.00114 | 0.74982   |
| =====     |    |                |                    |           |         |           |
| * Total * |    | -0.00000       | 73.97666           | 115.53529 | 0.48806 | 190.00000 |

# M06/TZVP level

$\Delta E(\text{multipl.}=1) = 0.0 \text{ кДж/моль}$

$\Delta E(\text{multipl.}=3) = 148.7 \text{ кДж/моль}$

Alpha occupied eigenvalues (highest) = -5.888244 eV

Alpha virtual eigenvalues (lowest) = -2.8456218 eV

$\langle S^2 \rangle = 0.0000$

## Summary of Natural Population Analysis:

|           |    | Natural Population |          |           |         |           |
|-----------|----|--------------------|----------|-----------|---------|-----------|
| Atom      | No | Natural Charge     | Core     | Valence   | Rydberg | Total     |
| Ni        | 1  | 0.38236            | 17.99170 | 9.61426   | 0.01167 | 27.61764  |
| N         | 2  | -0.33535           | 1.99918  | 5.30298   | 0.03319 | 7.33535   |
| N         | 3  | -0.19794           | 1.99906  | 5.16945   | 0.02943 | 7.19794   |
| N         | 4  | -0.33539           | 1.99918  | 5.30303   | 0.03318 | 7.33539   |
| N         | 5  | -0.19794           | 1.99906  | 5.16945   | 0.02943 | 7.19794   |
| N         | 6  | -0.40747           | 1.99939  | 5.38632   | 0.02177 | 7.40747   |
| N         | 7  | -0.40750           | 1.99939  | 5.38634   | 0.02177 | 7.40750   |
| H         | 8  | 0.41423            | 0.00000  | 0.58283   | 0.00294 | 0.58577   |
| H         | 9  | 0.41425            | 0.00000  | 0.58281   | 0.00294 | 0.58575   |
| C         | 10 | 0.21038            | 1.99941  | 3.75606   | 0.03415 | 5.78962   |
| C         | 11 | 0.21038            | 1.99941  | 3.75605   | 0.03415 | 5.78962   |
| S         | 12 | -0.14902           | 9.99903  | 6.12940   | 0.02058 | 16.14902  |
| S         | 13 | -0.14904           | 9.99903  | 6.12943   | 0.02058 | 16.14904  |
| N         | 14 | -0.14646           | 1.99928  | 5.12375   | 0.02342 | 7.14646   |
| N         | 15 | -0.14643           | 1.99929  | 5.12372   | 0.02342 | 7.14643   |
| C         | 16 | 0.22884            | 1.99917  | 3.75193   | 0.02006 | 5.77116   |
| C         | 17 | 0.22887            | 1.99917  | 3.75191   | 0.02006 | 5.77113   |
| C         | 18 | 0.12195            | 1.99918  | 3.85654   | 0.02233 | 5.87805   |
| C         | 19 | 0.12195            | 1.99918  | 3.85654   | 0.02233 | 5.87805   |
| C         | 20 | -0.67040           | 1.99939  | 4.66275   | 0.00826 | 6.67040   |
| H         | 21 | 0.23019            | 0.00000  | 0.76803   | 0.00178 | 0.76981   |
| H         | 22 | 0.23017            | 0.00000  | 0.76805   | 0.00178 | 0.76983   |
| H         | 23 | 0.24303            | 0.00000  | 0.75594   | 0.00103 | 0.75697   |
| C         | 24 | -0.62323           | 1.99940  | 4.61605   | 0.00778 | 6.62323   |
| H         | 25 | 0.20675            | 0.00000  | 0.79185   | 0.00140 | 0.79325   |
| H         | 26 | 0.20676            | 0.00000  | 0.79185   | 0.00140 | 0.79324   |
| H         | 27 | 0.24640            | 0.00000  | 0.75235   | 0.00125 | 0.75360   |
| C         | 28 | -0.62324           | 1.99940  | 4.61606   | 0.00778 | 6.62324   |
| H         | 29 | 0.20676            | 0.00000  | 0.79184   | 0.00140 | 0.79324   |
| H         | 30 | 0.24641            | 0.00000  | 0.75234   | 0.00125 | 0.75359   |
| H         | 31 | 0.20676            | 0.00000  | 0.79185   | 0.00140 | 0.79324   |
| C         | 32 | -0.67040           | 1.99939  | 4.66275   | 0.00826 | 6.67040   |
| H         | 33 | 0.23019            | 0.00000  | 0.76803   | 0.00178 | 0.76981   |
| H         | 34 | 0.23017            | 0.00000  | 0.76805   | 0.00178 | 0.76983   |
| H         | 35 | 0.24303            | 0.00000  | 0.75594   | 0.00103 | 0.75697   |
| =====     |    |                    |          |           |         |           |
| * Total * |    | -0.00000           | 73.97668 | 115.54653 | 0.47679 | 190.00000 |

# OPBE/TZVP level

$\Delta E(\text{multipl.}=1) = 0.0$  кДж/моль

$\Delta E(\text{multipl.}=3) = 101.6$  кДж/моль

Alpha occupied eigenvalues (highest) = -4.7005275 eV

Alpha virtual eigenvalues (lowest) = -3.4847847 eV

$\langle S^2 \rangle = 0.0000$

## Summary of Natural Population Analysis:

|           |    | Natural Population |          |           |         |           |
|-----------|----|--------------------|----------|-----------|---------|-----------|
| Atom      | No | Natural Charge     | Core     | Valence   | Rydberg | Total     |
| Ni        | 1  | 0.31367            | 17.99128 | 9.68066   | 0.01439 | 27.68633  |
| N         | 2  | -0.26538           | 1.99921  | 5.23324   | 0.03293 | 7.26538   |
| N         | 3  | -0.17255           | 1.99910  | 5.14287   | 0.03058 | 7.17255   |
| N         | 4  | -0.26545           | 1.99921  | 5.23331   | 0.03292 | 7.26545   |
| N         | 5  | -0.17254           | 1.99910  | 5.14286   | 0.03058 | 7.17254   |
| N         | 6  | -0.36457           | 1.99940  | 5.34487   | 0.02031 | 7.36457   |
| N         | 7  | -0.36459           | 1.99940  | 5.34489   | 0.02031 | 7.36459   |
| H         | 8  | 0.42115            | 0.00000  | 0.57555   | 0.00331 | 0.57885   |
| H         | 9  | 0.42117            | 0.00000  | 0.57552   | 0.00331 | 0.57883   |
| C         | 10 | 0.13375            | 1.99942  | 3.83568   | 0.03116 | 5.86625   |
| C         | 11 | 0.13379            | 1.99942  | 3.83563   | 0.03116 | 5.86621   |
| S         | 12 | -0.12198           | 9.99901  | 6.10353   | 0.01944 | 16.12198  |
| S         | 13 | -0.12206           | 9.99901  | 6.10361   | 0.01943 | 16.12206  |
| N         | 14 | -0.12851           | 1.99933  | 5.10737   | 0.02181 | 7.12851   |
| N         | 15 | -0.12847           | 1.99933  | 5.10734   | 0.02181 | 7.12847   |
| C         | 16 | 0.16403            | 1.99919  | 3.81760   | 0.01918 | 5.83597   |
| C         | 17 | 0.16404            | 1.99919  | 3.81759   | 0.01918 | 5.83596   |
| C         | 18 | 0.09909            | 1.99921  | 3.88012   | 0.02158 | 5.90091   |
| C         | 19 | 0.09909            | 1.99921  | 3.88012   | 0.02158 | 5.90091   |
| C         | 20 | -0.70424           | 1.99940  | 4.69778   | 0.00705 | 6.70424   |
| H         | 21 | 0.24029            | 0.00000  | 0.75789   | 0.00182 | 0.75971   |
| H         | 22 | 0.24028            | 0.00000  | 0.75790   | 0.00182 | 0.75972   |
| H         | 23 | 0.25924            | 0.00000  | 0.73956   | 0.00121 | 0.74076   |
| C         | 24 | -0.66552           | 1.99942  | 4.65944   | 0.00667 | 6.66552   |
| H         | 25 | 0.22384            | 0.00000  | 0.77477   | 0.00139 | 0.77616   |
| H         | 26 | 0.22384            | 0.00000  | 0.77477   | 0.00139 | 0.77616   |
| H         | 27 | 0.26044            | 0.00000  | 0.73814   | 0.00143 | 0.73956   |
| C         | 28 | -0.66553           | 1.99942  | 4.65944   | 0.00667 | 6.66553   |
| H         | 29 | 0.22385            | 0.00000  | 0.77477   | 0.00139 | 0.77615   |
| H         | 30 | 0.26044            | 0.00000  | 0.73813   | 0.00143 | 0.73956   |
| H         | 31 | 0.22384            | 0.00000  | 0.77477   | 0.00139 | 0.77616   |
| C         | 32 | -0.70423           | 1.99940  | 4.69777   | 0.00705 | 6.70423   |
| H         | 33 | 0.24028            | 0.00000  | 0.75789   | 0.00182 | 0.75972   |
| H         | 34 | 0.24027            | 0.00000  | 0.75791   | 0.00182 | 0.75973   |
| H         | 35 | 0.25922            | 0.00000  | 0.73957   | 0.00121 | 0.74078   |
| =====     |    |                    |          |           |         |           |
| * Total * |    | -0.00000           | 73.97666 | 115.56284 | 0.46049 | 190.00000 |

## NBO Analysis Data of CuL complex (L<sup>2-</sup> is double deprotonated form of 3,10-dithio-6,7,13,14-tetramethyl-1,2,4,5,8,9,11,12-octaazacyclotetradecatetraene-1,5,7,12)

### DFT B3PW91/TZVP level

$\Delta E(\text{multipl.}=2) = 0.0$  кДж/моль

$\Delta E(\text{multipl.}=4) = 144.7$  кДж/моль

Alpha occupied eigenvalues (highest) = -5.8327356 eV

Alpha virtual eigenvalues (lowest) = -3.0589482 eV

Beta occupied eigenvalues (highest) = -5.7891996 eV

Beta virtual eigenvalues (lowest) = -3.0439827 eV

$\langle S^2 \rangle = 0.7500$

### Summary of Natural Population Analysis:

|           |    |                | Natural Population |           |         |           |
|-----------|----|----------------|--------------------|-----------|---------|-----------|
| Atom      | No | Natural Charge | Core               | Valence   | Rydberg | Total     |
| -----     |    |                |                    |           |         |           |
| Cu        | 1  | 0.72967        | 17.99418           | 10.26765  | 0.00850 | 28.27033  |
| N         | 2  | -0.41057       | 1.99926            | 5.37391   | 0.03740 | 7.41057   |
| N         | 3  | -0.25679       | 1.99917            | 5.22545   | 0.03217 | 7.25679   |
| N         | 4  | -0.41057       | 1.99926            | 5.37391   | 0.03740 | 7.41057   |
| N         | 5  | -0.25679       | 1.99917            | 5.22545   | 0.03217 | 7.25679   |
| N         | 6  | -0.39158       | 1.99942            | 5.36907   | 0.02309 | 7.39158   |
| N         | 7  | -0.39158       | 1.99942            | 5.36907   | 0.02309 | 7.39158   |
| H         | 8  | 0.41419        | 0.00000            | 0.58254   | 0.00327 | 0.58581   |
| H         | 9  | 0.41419        | 0.00000            | 0.58254   | 0.00327 | 0.58581   |
| C         | 10 | 0.18775        | 1.99943            | 3.78004   | 0.03278 | 5.81225   |
| C         | 11 | 0.18775        | 1.99943            | 3.78004   | 0.03278 | 5.81225   |
| S         | 12 | -0.15300       | 9.99902            | 6.13314   | 0.02085 | 16.15300  |
| S         | 13 | -0.15300       | 9.99902            | 6.13314   | 0.02085 | 16.15300  |
| N         | 14 | -0.15319       | 1.99930            | 5.12955   | 0.02434 | 7.15319   |
| N         | 15 | -0.15319       | 1.99930            | 5.12955   | 0.02434 | 7.15319   |
| C         | 16 | 0.20539        | 1.99919            | 3.77425   | 0.02117 | 5.79461   |
| C         | 17 | 0.20539        | 1.99919            | 3.77425   | 0.02117 | 5.79461   |
| C         | 18 | 0.12140        | 1.99923            | 3.85582   | 0.02355 | 5.87860   |
| C         | 19 | 0.12140        | 1.99923            | 3.85582   | 0.02355 | 5.87860   |
| C         | 20 | -0.68618       | 1.99941            | 4.67831   | 0.00846 | 6.68618   |
| H         | 21 | 0.23461        | 0.00000            | 0.76361   | 0.00178 | 0.76539   |
| H         | 22 | 0.23453        | 0.00000            | 0.76369   | 0.00178 | 0.76547   |
| H         | 23 | 0.24880        | 0.00000            | 0.75001   | 0.00119 | 0.75120   |
| C         | 24 | -0.63951       | 1.99942            | 4.63209   | 0.00801 | 6.63951   |
| H         | 25 | 0.21294        | 0.00000            | 0.78569   | 0.00137 | 0.78706   |
| H         | 26 | 0.21294        | 0.00000            | 0.78569   | 0.00137 | 0.78706   |
| H         | 27 | 0.25345        | 0.00000            | 0.74519   | 0.00136 | 0.74655   |
| C         | 28 | -0.63951       | 1.99942            | 4.63209   | 0.00801 | 6.63951   |
| H         | 29 | 0.21294        | 0.00000            | 0.78569   | 0.00137 | 0.78706   |
| H         | 30 | 0.25345        | 0.00000            | 0.74519   | 0.00136 | 0.74655   |
| H         | 31 | 0.21294        | 0.00000            | 0.78569   | 0.00137 | 0.78706   |
| C         | 32 | -0.68618       | 1.99941            | 4.67831   | 0.00846 | 6.68618   |
| H         | 33 | 0.23461        | 0.00000            | 0.76361   | 0.00178 | 0.76539   |
| H         | 34 | 0.23453        | 0.00000            | 0.76369   | 0.00178 | 0.76547   |
| H         | 35 | 0.24880        | 0.00000            | 0.75001   | 0.00119 | 0.75120   |
| =====     |    |                |                    |           |         |           |
| * Total * |    | -0.00000       | 73.97986           | 116.52379 | 0.49635 | 191.00000 |

# M06/TZVP level

$\Delta E(\text{multipl.}=2) = 0.0 \text{ кДж/моль}$

$\Delta E(\text{multipl.}=4) = 200.1 \text{ кДж/моль}$

Alpha occupied eigenvalues (highest) = -6.0000771 eV

Alpha virtual eigenvalues (lowest) = -2.8067115 eV

Beta occupied eigenvalues (highest) = -5.9862 eV

Beta virtual eigenvalues (lowest) = -2.7925623 eV

$\langle S^2 \rangle = 0.7500$

## Summary of Natural Population Analysis:

### Natural Population

| Atom      | No | Natural Charge | Core     | Valence   | Rydberg | Total     |
|-----------|----|----------------|----------|-----------|---------|-----------|
| Cu        | 1  | 0.71114        | 17.99425 | 10.28591  | 0.00871 | 28.28886  |
| N         | 2  | -0.42463       | 1.99925  | 5.38941   | 0.03598 | 7.42463   |
| N         | 3  | -0.26202       | 1.99915  | 5.23179   | 0.03108 | 7.26202   |
| N         | 4  | -0.42463       | 1.99925  | 5.38941   | 0.03598 | 7.42463   |
| N         | 5  | -0.26202       | 1.99915  | 5.23179   | 0.03108 | 7.26202   |
| N         | 6  | -0.40705       | 1.99942  | 5.38522   | 0.02240 | 7.40705   |
| N         | 7  | -0.40705       | 1.99942  | 5.38522   | 0.02240 | 7.40705   |
| H         | 8  | 0.40930        | 0.00000  | 0.58754   | 0.00316 | 0.59070   |
| H         | 9  | 0.40930        | 0.00000  | 0.58754   | 0.00316 | 0.59070   |
| C         | 10 | 0.21228        | 1.99942  | 3.75534   | 0.03296 | 5.78772   |
| C         | 11 | 0.21228        | 1.99942  | 3.75534   | 0.03296 | 5.78772   |
| S         | 12 | -0.15245       | 9.99903  | 6.13310   | 0.02032 | 16.15245  |
| S         | 13 | -0.15245       | 9.99903  | 6.13310   | 0.02032 | 16.15245  |
| N         | 14 | -0.15706       | 1.99928  | 5.13287   | 0.02491 | 7.15706   |
| N         | 15 | -0.15706       | 1.99928  | 5.13287   | 0.02491 | 7.15706   |
| C         | 16 | 0.22830        | 1.99917  | 3.75172   | 0.02081 | 5.77170   |
| C         | 17 | 0.22830        | 1.99917  | 3.75172   | 0.02081 | 5.77170   |
| C         | 18 | 0.13430        | 1.99920  | 3.84415   | 0.02235 | 5.86570   |
| C         | 19 | 0.13430        | 1.99920  | 3.84415   | 0.02235 | 5.86570   |
| C         | 20 | -0.67328       | 1.99939  | 4.66545   | 0.00844 | 6.67328   |
| H         | 21 | 0.22990        | 0.00000  | 0.76832   | 0.00178 | 0.77010   |
| H         | 22 | 0.22989        | 0.00000  | 0.76833   | 0.00178 | 0.77011   |
| H         | 23 | 0.24171        | 0.00000  | 0.75722   | 0.00107 | 0.75829   |
| C         | 24 | -0.62377       | 1.99940  | 4.61659   | 0.00778 | 6.62377   |
| H         | 25 | 0.20633        | 0.00000  | 0.79228   | 0.00139 | 0.79367   |
| H         | 26 | 0.20633        | 0.00000  | 0.79228   | 0.00139 | 0.79367   |
| H         | 27 | 0.24635        | 0.00000  | 0.75236   | 0.00129 | 0.75365   |
| C         | 28 | -0.62377       | 1.99940  | 4.61659   | 0.00778 | 6.62377   |
| H         | 29 | 0.20633        | 0.00000  | 0.79228   | 0.00139 | 0.79367   |
| H         | 30 | 0.24635        | 0.00000  | 0.75236   | 0.00129 | 0.75365   |
| H         | 31 | 0.20633        | 0.00000  | 0.79228   | 0.00139 | 0.79367   |
| C         | 32 | -0.67328       | 1.99939  | 4.66545   | 0.00844 | 6.67328   |
| H         | 33 | 0.22992        | 0.00000  | 0.76830   | 0.00178 | 0.77008   |
| H         | 34 | 0.22988        | 0.00000  | 0.76834   | 0.00178 | 0.77012   |
| H         | 35 | 0.24171        | 0.00000  | 0.75722   | 0.00107 | 0.75829   |
| =====     |    |                |          |           |         |           |
| * Total * |    | -0.00000       | 73.97968 | 116.53380 | 0.48652 | 191.00000 |

## OPBE/TZVP level

$\Delta E(\text{multipl.}=2) = 0.0$  кДж/моль

$\Delta E(\text{multipl.}=4) = 120.7$  кДж/моль

Alpha occupied eigenvalues (highest) = -4.1971425 eV

Alpha virtual eigenvalues (lowest) = -3.4787985 eV

Beta occupied eigenvalues (highest) = -4.9995654 eV

Beta virtual eigenvalues (lowest) = -3.4499559 eV

$\langle S^2 \rangle = 0.7500$

### Summary of Natural Population Analysis:

|           |    |                | Natural Population |           |         |           |
|-----------|----|----------------|--------------------|-----------|---------|-----------|
| Atom      | No | Natural Charge | Core               | Valence   | Rydberg | Total     |
| Cu        | 1  | 0.67173        | 17.99426           | 10.32433  | 0.00967 | 28.32827  |
| N         | 2  | -0.36379       | 1.99929            | 5.32896   | 0.03554 | 7.36379   |
| N         | 3  | -0.24518       | 1.99921            | 5.21408   | 0.03190 | 7.24518   |
| N         | 4  | -0.36379       | 1.99929            | 5.32896   | 0.03554 | 7.36379   |
| N         | 5  | -0.24519       | 1.99921            | 5.21409   | 0.03190 | 7.24519   |
| N         | 6  | -0.36106       | 1.99943            | 5.34078   | 0.02085 | 7.36106   |
| N         | 7  | -0.36106       | 1.99943            | 5.34078   | 0.02085 | 7.36106   |
| H         | 8  | 0.41489        | 0.00000            | 0.58153   | 0.00358 | 0.58511   |
| H         | 9  | 0.41489        | 0.00000            | 0.58153   | 0.00358 | 0.58511   |
| C         | 10 | 0.13772        | 1.99944            | 3.83311   | 0.02973 | 5.86228   |
| C         | 11 | 0.13772        | 1.99944            | 3.83311   | 0.02973 | 5.86228   |
| S         | 12 | -0.12675       | 9.99901            | 6.10849   | 0.01924 | 16.12675  |
| S         | 13 | -0.12675       | 9.99901            | 6.10849   | 0.01924 | 16.12675  |
| N         | 14 | -0.13880       | 1.99933            | 5.11639   | 0.02308 | 7.13880   |
| N         | 15 | -0.13880       | 1.99933            | 5.11639   | 0.02308 | 7.13880   |
| C         | 16 | 0.16882        | 1.99920            | 3.81221   | 0.01978 | 5.83118   |
| C         | 17 | 0.16882        | 1.99920            | 3.81221   | 0.01978 | 5.83118   |
| C         | 18 | 0.10783        | 1.99924            | 3.87124   | 0.02169 | 5.89217   |
| C         | 19 | 0.10783        | 1.99924            | 3.87124   | 0.02169 | 5.89217   |
| C         | 20 | -0.70753       | 1.99941            | 4.70093   | 0.00719 | 6.70753   |
| H         | 21 | 0.24026        | 0.00000            | 0.75794   | 0.00180 | 0.75974   |
| H         | 22 | 0.24026        | 0.00000            | 0.75792   | 0.00181 | 0.75974   |
| H         | 23 | 0.25727        | 0.00000            | 0.74144   | 0.00129 | 0.74273   |
| C         | 24 | -0.66621       | 1.99942            | 4.66011   | 0.00668 | 6.66621   |
| H         | 25 | 0.22305        | 0.00000            | 0.77556   | 0.00140 | 0.77695   |
| H         | 26 | 0.22301        | 0.00000            | 0.77559   | 0.00140 | 0.77699   |
| H         | 27 | 0.26034        | 0.00000            | 0.73815   | 0.00150 | 0.73966   |
| C         | 28 | -0.66621       | 1.99942            | 4.66011   | 0.00668 | 6.66621   |
| H         | 29 | 0.22301        | 0.00000            | 0.77559   | 0.00140 | 0.77699   |
| H         | 30 | 0.26034        | 0.00000            | 0.73815   | 0.00150 | 0.73966   |
| H         | 31 | 0.22305        | 0.00000            | 0.77555   | 0.00140 | 0.77695   |
| C         | 32 | -0.70753       | 1.99941            | 4.70093   | 0.00719 | 6.70753   |
| H         | 33 | 0.24025        | 0.00000            | 0.75795   | 0.00180 | 0.75975   |
| H         | 34 | 0.24027        | 0.00000            | 0.75792   | 0.00181 | 0.75973   |
| H         | 35 | 0.25727        | 0.00000            | 0.74144   | 0.00129 | 0.74273   |
| =====     |    |                |                    |           |         |           |
| * Total * |    | -0.00000       | 73.98022           | 116.55321 | 0.46658 | 191.00000 |

**NBO Analysis Data of ZnL complex (L<sup>2-</sup> is double deprotonated form of 3,10-dithio-6,7,13,14-tetramethyl-1,2,4,5,8,9,11,12-octaazacyclotetradecatetraene-1,5,7,12)**

**DFT B3PW91/TZVP level**

$\Delta E(\text{multipl.}=1) = 0.0 \text{ кДж/моль}$

$\Delta E(\text{multipl.}=3) = 146.7 \text{ кДж/моль}$

Alpha occupied eigenvalues (highest) = -5.8623945 eV

Alpha virtual eigenvalues (lowest) = -3.0096981 eV

$\langle S^2 \rangle = 0.0000$

**Summary of Natural Population Analysis:**

|           |    |                | Natural Population |           |         |           |
|-----------|----|----------------|--------------------|-----------|---------|-----------|
| Atom      | No | Natural Charge | Core               | Valence   | Rydberg | Total     |
| -----     |    |                |                    |           |         |           |
| Zn        | 1  | 1.08887        | 17.99585           | 10.90968  | 0.00560 | 28.91113  |
| N         | 2  | -0.50842       | 1.99930            | 5.47319   | 0.03594 | 7.50842   |
| N         | 3  | -0.32125       | 1.99925            | 5.29207   | 0.02992 | 7.32125   |
| N         | 4  | -0.50859       | 1.99930            | 5.47335   | 0.03594 | 7.50859   |
| N         | 5  | -0.32140       | 1.99925            | 5.29221   | 0.02993 | 7.32140   |
| N         | 6  | -0.39133       | 1.99944            | 5.36821   | 0.02368 | 7.39133   |
| N         | 7  | -0.39145       | 1.99944            | 5.36835   | 0.02366 | 7.39145   |
| H         | 8  | 0.41099        | 0.00000            | 0.58556   | 0.00345 | 0.58901   |
| H         | 9  | 0.41097        | 0.00000            | 0.58558   | 0.00345 | 0.58903   |
| C         | 10 | 0.18945        | 1.99942            | 3.77739   | 0.03373 | 5.81055   |
| C         | 11 | 0.18957        | 1.99942            | 3.77727   | 0.03374 | 5.81043   |
| S         | 12 | -0.15278       | 9.99901            | 6.13292   | 0.02085 | 16.15278  |
| S         | 13 | -0.15288       | 9.99901            | 6.13303   | 0.02084 | 16.15288  |
| N         | 14 | -0.17131       | 1.99931            | 5.14692   | 0.02508 | 7.17131   |
| N         | 15 | -0.17125       | 1.99931            | 5.14687   | 0.02507 | 7.17125   |
| C         | 16 | 0.20292        | 1.99919            | 3.77624   | 0.02165 | 5.79708   |
| C         | 17 | 0.20297        | 1.99919            | 3.77619   | 0.02166 | 5.79703   |
| C         | 18 | 0.13212        | 1.99924            | 3.84504   | 0.02360 | 5.86788   |
| C         | 19 | 0.13204        | 1.99924            | 3.84513   | 0.02359 | 5.86796   |
| C         | 20 | -0.68905       | 1.99941            | 4.68118   | 0.00846 | 6.68905   |
| H         | 21 | 0.23419        | 0.00000            | 0.76404   | 0.00177 | 0.76581   |
| H         | 22 | 0.23416        | 0.00000            | 0.76407   | 0.00177 | 0.76584   |
| H         | 23 | 0.24757        | 0.00000            | 0.75120   | 0.00122 | 0.75243   |
| C         | 24 | -0.63989       | 1.99942            | 4.63243   | 0.00804 | 6.63989   |
| H         | 25 | 0.21231        | 0.00000            | 0.78632   | 0.00137 | 0.78769   |
| H         | 26 | 0.21232        | 0.00000            | 0.78632   | 0.00137 | 0.78768   |
| H         | 27 | 0.25377        | 0.00000            | 0.74485   | 0.00139 | 0.74623   |
| C         | 28 | -0.63991       | 1.99942            | 4.63246   | 0.00804 | 6.63991   |
| H         | 29 | 0.21231        | 0.00000            | 0.78632   | 0.00137 | 0.78769   |
| H         | 30 | 0.25377        | 0.00000            | 0.74484   | 0.00139 | 0.74623   |
| H         | 31 | 0.21231        | 0.00000            | 0.78633   | 0.00137 | 0.78769   |
| C         | 32 | -0.68908       | 1.99941            | 4.68122   | 0.00845 | 6.68908   |
| H         | 33 | 0.23420        | 0.00000            | 0.76403   | 0.00177 | 0.76580   |
| H         | 34 | 0.23418        | 0.00000            | 0.76405   | 0.00177 | 0.76582   |
| H         | 35 | 0.24758        | 0.00000            | 0.75120   | 0.00122 | 0.75242   |
| =====     |    |                |                    |           |         |           |
| * Total * |    | -0.00000       | 73.98183           | 117.52606 | 0.49211 | 192.00000 |

# M06/TZVP level

$\Delta E(\text{multipl.}=1) = 0.0$  кДж/моль

$\Delta E(\text{multipl.}=3) = 157.3$  кДж/моль

Alpha occupied eigenvalues (highest) = -6.0585786 eV

Alpha virtual eigenvalues (lowest) = -2.7356934 eV

$\langle S^2 \rangle = 0.0000$

## Summary of Natural Population Analysis:

|           |    | Natural Population |          |           |         |           |
|-----------|----|--------------------|----------|-----------|---------|-----------|
| Atom      | No | Natural Charge     | Core     | Valence   | Rydberg | Total     |
| Zn        | 1  | 1.07174            | 17.99587 | 10.92718  | 0.00521 | 28.92826  |
| N         | 2  | -0.52395           | 1.99928  | 5.49017   | 0.03449 | 7.52395   |
| N         | 3  | -0.32612           | 1.99923  | 5.29802   | 0.02887 | 7.32612   |
| N         | 4  | -0.52395           | 1.99928  | 5.49017   | 0.03449 | 7.52395   |
| N         | 5  | -0.32612           | 1.99923  | 5.29802   | 0.02887 | 7.32612   |
| N         | 6  | -0.40734           | 1.99944  | 5.38508   | 0.02282 | 7.40734   |
| N         | 7  | -0.40733           | 1.99944  | 5.38508   | 0.02282 | 7.40733   |
| H         | 8  | 0.40529            | 0.00000  | 0.59135   | 0.00336 | 0.59471   |
| H         | 9  | 0.40529            | 0.00000  | 0.59135   | 0.00336 | 0.59471   |
| C         | 10 | 0.21517            | 1.99942  | 3.75133   | 0.03409 | 5.78483   |
| C         | 11 | 0.21517            | 1.99942  | 3.75133   | 0.03409 | 5.78483   |
| S         | 12 | -0.15410           | 9.99902  | 6.13478   | 0.02030 | 16.15410  |
| S         | 13 | -0.15410           | 9.99902  | 6.13478   | 0.02030 | 16.15410  |
| N         | 14 | -0.17554           | 1.99929  | 5.15052   | 0.02574 | 7.17554   |
| N         | 15 | -0.17554           | 1.99929  | 5.15051   | 0.02574 | 7.17554   |
| C         | 16 | 0.22636            | 1.99917  | 3.75322   | 0.02125 | 5.77364   |
| C         | 17 | 0.22636            | 1.99917  | 3.75322   | 0.02125 | 5.77364   |
| C         | 18 | 0.14651            | 1.99921  | 3.83180   | 0.02249 | 5.85349   |
| C         | 19 | 0.14651            | 1.99921  | 3.83180   | 0.02249 | 5.85349   |
| C         | 20 | -0.67488           | 1.99939  | 4.66694   | 0.00855 | 6.67488   |
| H         | 21 | 0.23513            | 0.00000  | 0.76328   | 0.00159 | 0.76487   |
| H         | 22 | 0.22333            | 0.00000  | 0.77489   | 0.00178 | 0.77667   |
| H         | 23 | 0.23981            | 0.00000  | 0.75905   | 0.00114 | 0.76019   |
| C         | 24 | -0.62345           | 1.99940  | 4.61626   | 0.00779 | 6.62345   |
| H         | 25 | 0.20485            | 0.00000  | 0.79380   | 0.00135 | 0.79515   |
| H         | 26 | 0.20665            | 0.00000  | 0.79193   | 0.00142 | 0.79335   |
| H         | 27 | 0.24643            | 0.00000  | 0.75226   | 0.00131 | 0.75357   |
| C         | 28 | -0.62345           | 1.99940  | 4.61626   | 0.00779 | 6.62345   |
| H         | 29 | 0.20665            | 0.00000  | 0.79194   | 0.00142 | 0.79335   |
| H         | 30 | 0.24643            | 0.00000  | 0.75226   | 0.00131 | 0.75357   |
| H         | 31 | 0.20485            | 0.00000  | 0.79380   | 0.00135 | 0.79515   |
| C         | 32 | -0.67489           | 1.99939  | 4.66695   | 0.00855 | 6.67489   |
| H         | 33 | 0.23513            | 0.00000  | 0.76328   | 0.00159 | 0.76487   |
| H         | 34 | 0.22333            | 0.00000  | 0.77488   | 0.00178 | 0.77667   |
| H         | 35 | 0.23981            | 0.00000  | 0.75905   | 0.00114 | 0.76019   |
| =====     |    |                    |          |           |         |           |
| * Total * |    | 0.00000            | 73.98158 | 117.53656 | 0.48186 | 192.00000 |

# OPBE/TZVP level

$\Delta E(\text{multipl.}=1) = 0.0 \text{ кДж/моль}$

$\Delta E(\text{multipl.}=3) = 124.23 \text{ кДж/моль}$

Alpha occupied eigenvalues (highest) = -5.0090889 eV

Alpha virtual eigenvalues (lowest) = -3.4390719 eV

$\langle S^2 \rangle = 0.0000$

## Summary of Natural Population Analysis:

|           |    | Natural Population |          |           |         |           |
|-----------|----|--------------------|----------|-----------|---------|-----------|
| Atom      | No | Natural Charge     | Core     | Valence   | Rydberg | Total     |
| Zn        | 1  | 1.08463            | 17.99595 | 10.91273  | 0.00669 | 28.91537  |
| N         | 2  | -0.47478           | 1.99932  | 5.44154   | 0.03392 | 7.47478   |
| N         | 3  | -0.31822           | 1.99929  | 5.28956   | 0.02936 | 7.31822   |
| N         | 4  | -0.47501           | 1.99932  | 5.44176   | 0.03393 | 7.47501   |
| N         | 5  | -0.31857           | 1.99929  | 5.28990   | 0.02938 | 7.31857   |
| N         | 6  | -0.36041           | 1.99946  | 5.33959   | 0.02136 | 7.36041   |
| N         | 7  | -0.36054           | 1.99946  | 5.33974   | 0.02134 | 7.36054   |
| H         | 8  | 0.41160            | 0.00000  | 0.58468   | 0.00372 | 0.58840   |
| H         | 9  | 0.41156            | 0.00000  | 0.58472   | 0.00372 | 0.58844   |
| C         | 10 | 0.14175            | 1.99944  | 3.82821   | 0.03060 | 5.85825   |
| C         | 11 | 0.14186            | 1.99944  | 3.82809   | 0.03061 | 5.85814   |
| S         | 12 | -0.12744           | 9.99900  | 6.10918   | 0.01926 | 16.12744  |
| S         | 13 | -0.12751           | 9.99900  | 6.10924   | 0.01926 | 16.12751  |
| N         | 14 | -0.16515           | 1.99935  | 5.14198   | 0.02382 | 7.16515   |
| N         | 15 | -0.16505           | 1.99935  | 5.14190   | 0.02380 | 7.16505   |
| C         | 16 | 0.17062            | 1.99920  | 3.81003   | 0.02014 | 5.82938   |
| C         | 17 | 0.17062            | 1.99920  | 3.81002   | 0.02015 | 5.82938   |
| C         | 18 | 0.11635            | 1.99926  | 3.86262   | 0.02177 | 5.88365   |
| C         | 19 | 0.11618            | 1.99926  | 3.86281   | 0.02176 | 5.88382   |
| C         | 20 | -0.71116           | 1.99941  | 4.70461   | 0.00714 | 6.71116   |
| H         | 21 | 0.24018            | 0.00000  | 0.75803   | 0.00179 | 0.75982   |
| H         | 22 | 0.24016            | 0.00000  | 0.75805   | 0.00179 | 0.75984   |
| H         | 23 | 0.25625            | 0.00000  | 0.74242   | 0.00133 | 0.74375   |
| C         | 24 | -0.66668           | 1.99942  | 4.66056   | 0.00670 | 6.66668   |
| H         | 25 | 0.22197            | 0.00000  | 0.77664   | 0.00139 | 0.77803   |
| H         | 26 | 0.22197            | 0.00000  | 0.77664   | 0.00139 | 0.77803   |
| H         | 27 | 0.26111            | 0.00000  | 0.73735   | 0.00154 | 0.73889   |
| C         | 28 | -0.66672           | 1.99942  | 4.66061   | 0.00670 | 6.66672   |
| H         | 29 | 0.22196            | 0.00000  | 0.77665   | 0.00139 | 0.77804   |
| H         | 30 | 0.26111            | 0.00000  | 0.73735   | 0.00154 | 0.73889   |
| H         | 31 | 0.22196            | 0.00000  | 0.77665   | 0.00139 | 0.77804   |
| C         | 32 | -0.71122           | 1.99941  | 4.70468   | 0.00714 | 6.71122   |
| H         | 33 | 0.24019            | 0.00000  | 0.75802   | 0.00179 | 0.75981   |
| H         | 34 | 0.24017            | 0.00000  | 0.75804   | 0.00179 | 0.75983   |
| H         | 35 | 0.25626            | 0.00000  | 0.74241   | 0.00133 | 0.74374   |
| * Total * |    | -0.00000           | 73.98228 | 117.55701 | 0.46072 | 192.00000 |

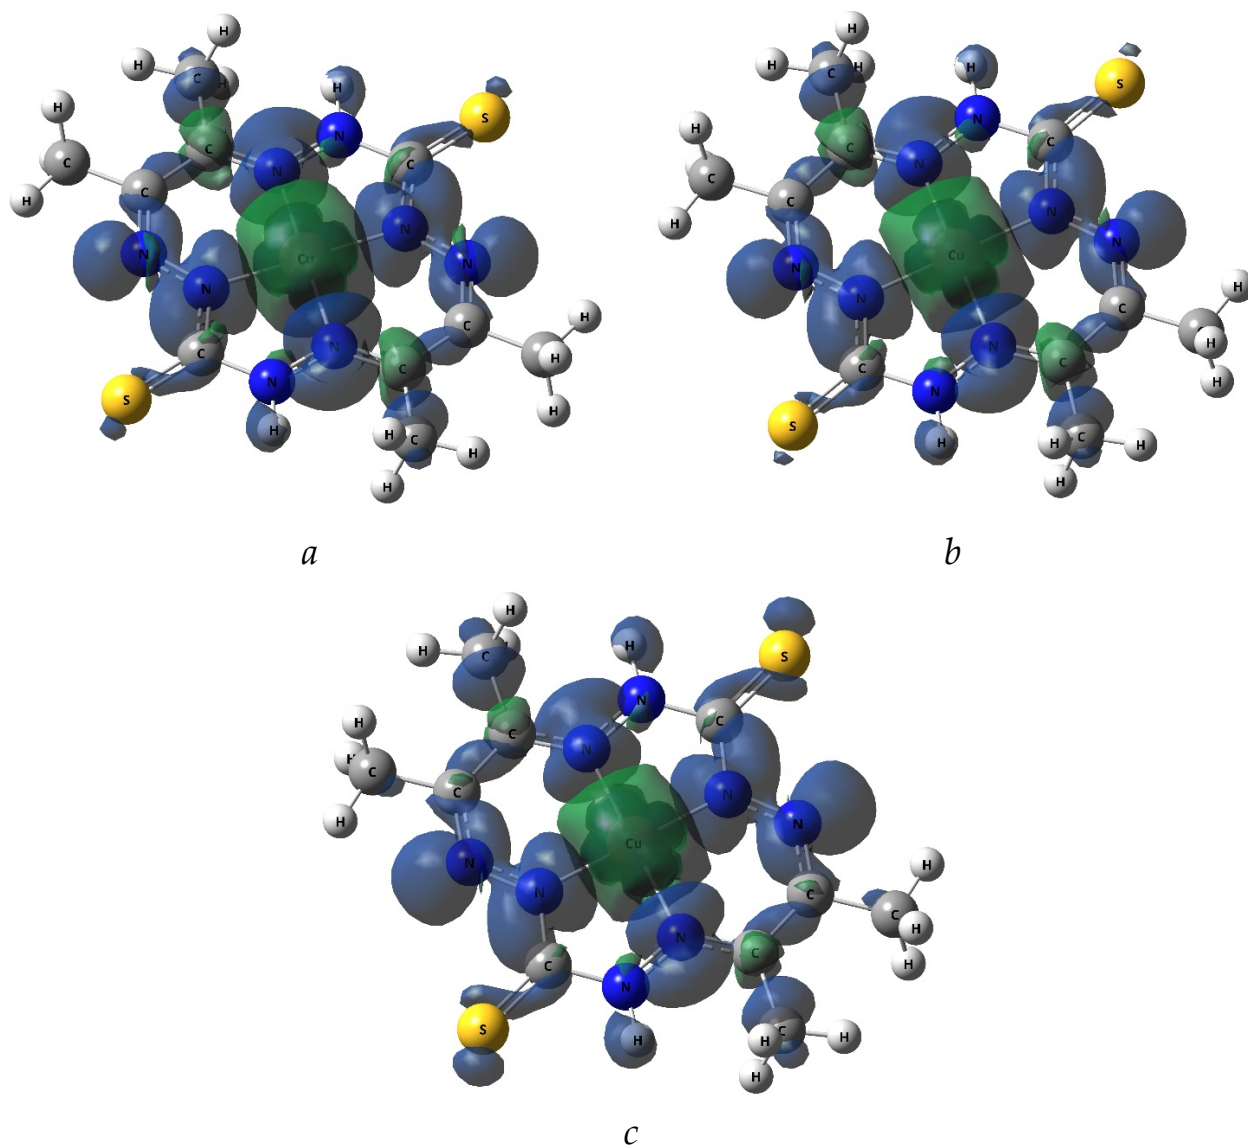

**Figure S1.** Spin density distribution in the CuL complex obtained by DFT B3PW91/ TZVP (*a*), DFT M06/TZVP (*b*) and DFT OPBE/TZVP (*c*) model chemistry.
